# Supplementary material for: Effect of UV-ozone process on the ZnO interlayer in the inverted organic solar cells
Source: Royal Society of Chemistry journal article supplement (doi:10.1039/c6ra25177c), 2017-01-01
Supplement: c6ra25177c1.pdf [file c6ra25177c1.pdf]

# Effect of UV-Ozone process on ZnO interlayer in inverted organic solar cells

Dou Li,<sup>ab</sup> Wenjing Qin,<sup>ab\*</sup> Shengchen Zhang,<sup>ab</sup> Dongyue Liu,<sup>ab</sup> Zhenyang Yu,<sup>c</sup>  
Jing Mao,<sup>d</sup> Linfeng Wu,<sup>ab</sup> Liying Yang,<sup>ab\*</sup> and Shougen Yin,<sup>ab\*</sup>

a. Key Laboratory of Display Materials and Photoelectric Devices, Education Ministry of China, School of Materials Science and Engineering, Tianjin University of Technology, Tianjin 300384, China. E-mail: [wjqin@tjut.edu.cn](mailto:wjqin@tjut.edu.cn); [liyingyang@tjut.edu.cn](mailto:liyingyang@tjut.edu.cn); [sgyin@tjut.edu.cn](mailto:sgyin@tjut.edu.cn)

b. Tianjin Key Laboratory for Photoelectric Materials and Devices, Tianjin University of Technology, Tianjin 300384, China.

c. School of Mechanical Engineering, Tianjin Polytechnic University, Tianjin, 300384, China.

d. Institute of New-Energy Materials, Key Laboratory of Advanced Ceramics and Machining Technology, Ministry of Education, School of Materials Science and Engineering, Tianjin University, Tianjin, 300072, China.

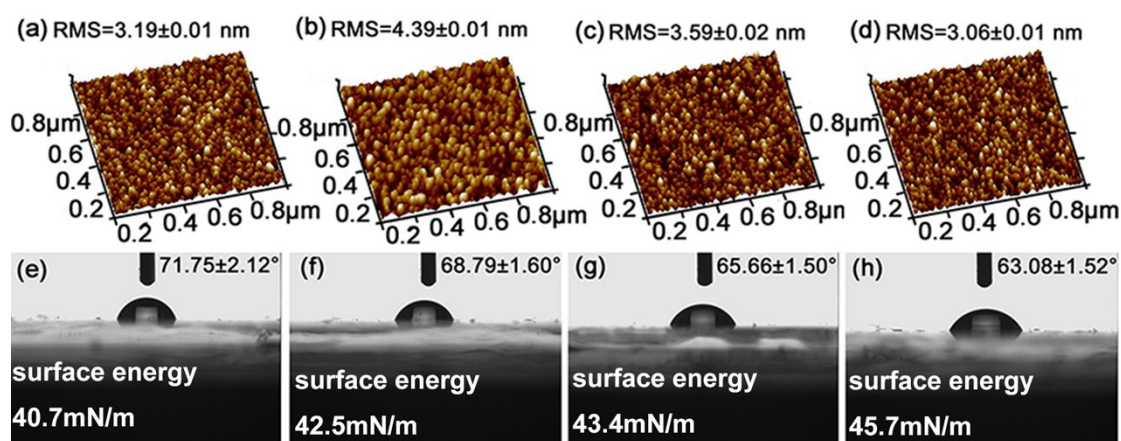

**Fig. S1.** AFM image and static contact angle of ZnONFs (a) (e) ZnO, (b) (f) ZnO-10, (c) (g) ZnO-20 and (d) (h) ZnO-30.

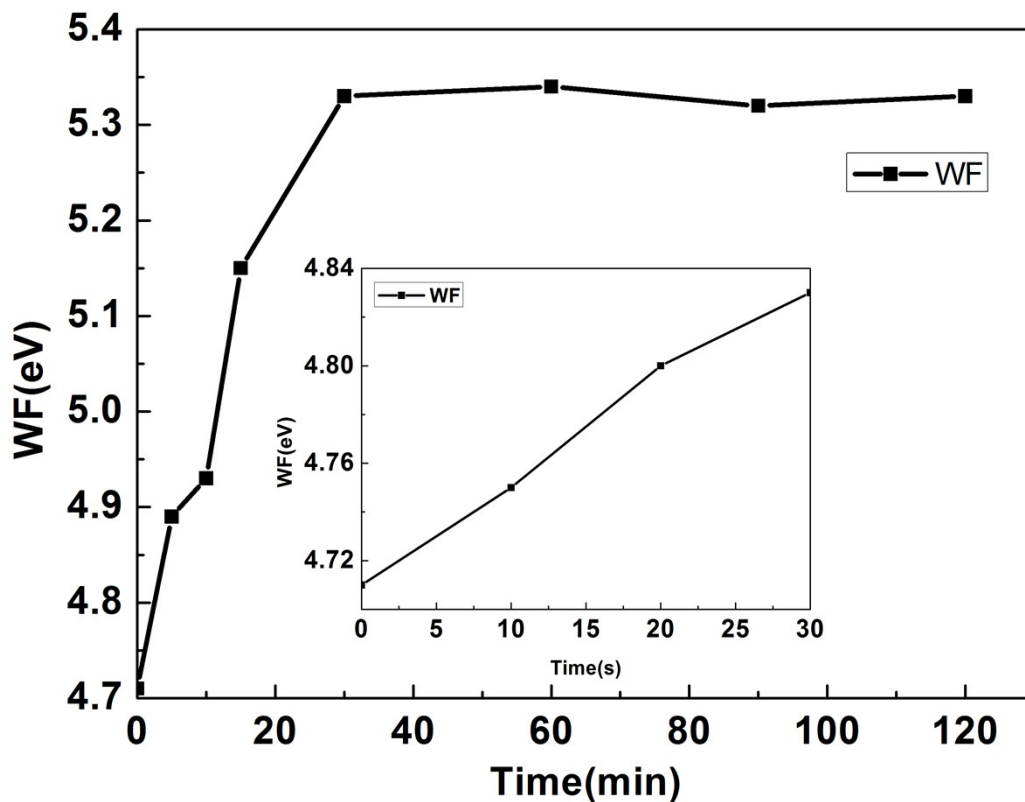

Fig. S2. The changes of WFs as treatment time. The insert one is for 0~30s.

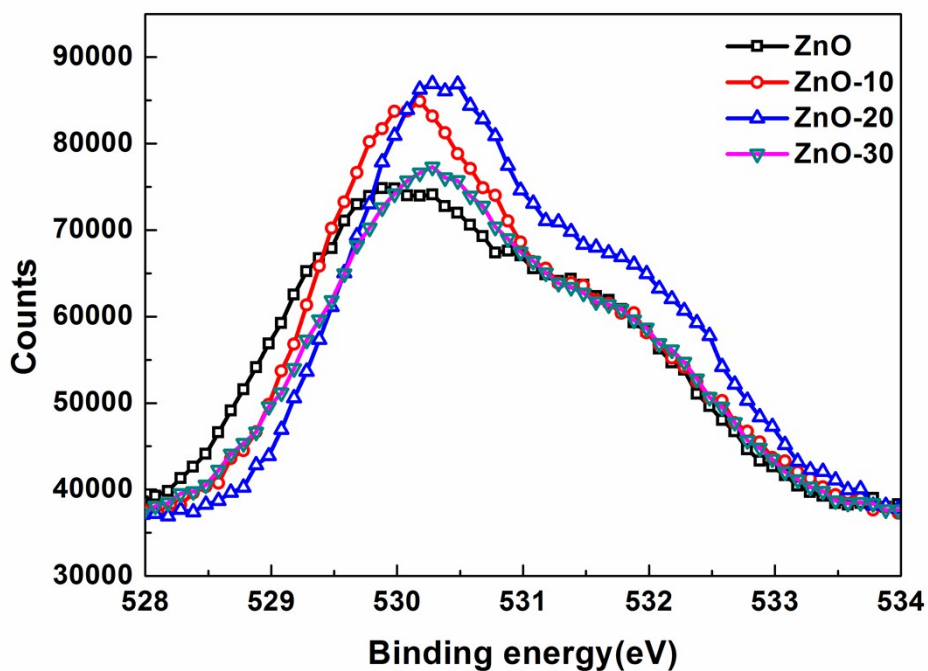

Fig. S3. The High-resolution XPS spectra of O 1s for ZnONFs and UV-Ozone treated ZnONFs

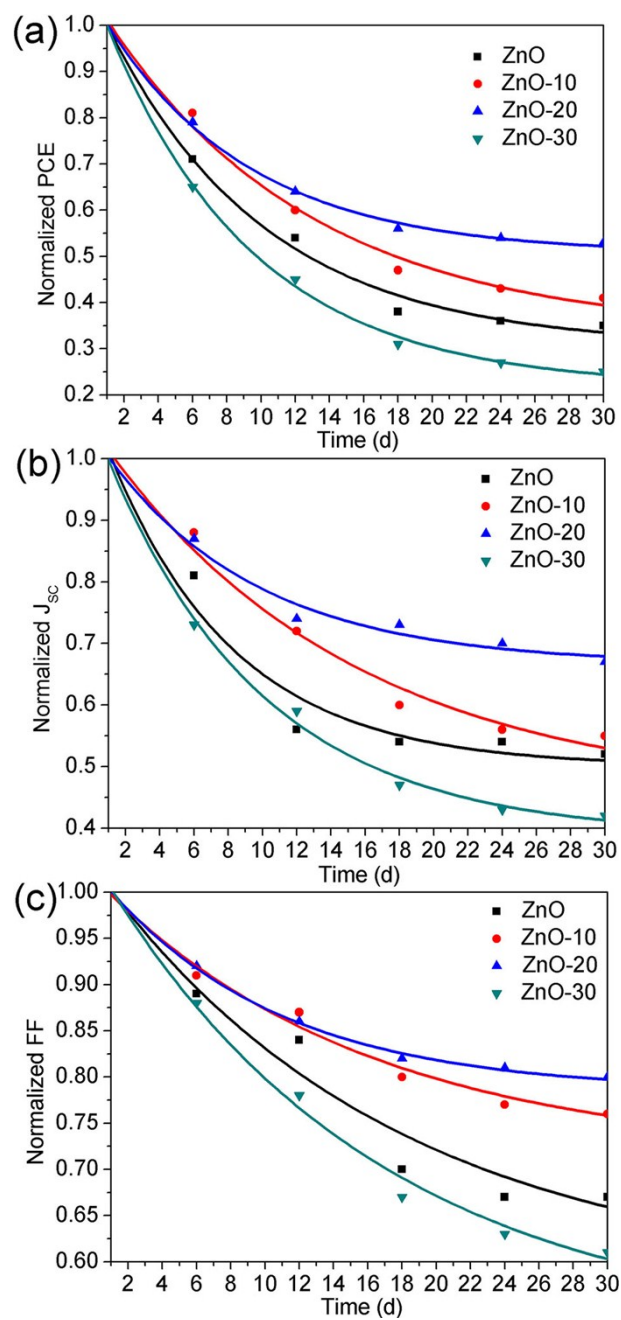

**Fig. S4.** The evolution of ITO/ZnONFs/P3HT:PCBM/MoO<sub>3</sub>/Ag performance parameters (a) PCE, (b) J<sub>sc</sub> and (c) FF.

**Table S1.** WFs of ZnONFs and ITO UV-ozone treated by different time, the data were statistics of 5 points.

| UV-Ozone treatment time | 0s    | 10s  | 20s  | 30s  |
|-------------------------|-------|------|------|------|
| ZnO WFs(eV)             | 4.71  | 4.75 | 4.80 | 4.83 |
| ITO WFs(eV)             | 4.72  | 4.73 | 4.75 | 4.76 |
| Gap WFs(eV)             | -0.01 | 0.02 | 0.05 | 0.09 |
